# Supplementary material for: Late Eating Is Associated with Obesity, Inflammatory Markers and Circadian-Related Disturbances in School-Aged Children
Source: MDPI journal article supplement (doi:10.3390/nu12092881), 2020-09-21
Supplement: s1 [file s1]

**Supplementary table 1.** Differences in BMI and waist circumference between Late Dinner Eaters (LDE) and Early Dinner Eaters (EDE) separated by sex.

| Boys                     | LDE  |     | EDE  |     | <i>P-value</i>   |
|--------------------------|------|-----|------|-----|------------------|
|                          | Mean | SEM | Mean | SEM |                  |
| Age (years)*             | 10   | 0.1 | 10   | 0.1 | 0.065            |
| BMI (kg/m <sup>2</sup> ) | 19.2 | 0.4 | 19.2 | 0.4 | 0.988            |
| BMI z-score              | 1.2  | 0.3 | 1.1  | 0.2 | 0.840            |
| Waist circumference (cm) | 66.5 | 1.2 | 66.1 | 1.1 | 0.814            |
| Overweight/obesity (%)   | 16.4 |     | 16.4 |     | 0.578            |
| <b>Girls</b>             |      |     |      |     |                  |
| Age (years)*             | 10   | 0.1 | 10   | 0.1 | 0.903            |
| BMI (kg/m <sup>2</sup> ) | 19.8 | 0.3 | 18.1 | 0.3 | <b>&lt;0.001</b> |
| BMI z-score              | 1.5  | 0.2 | 0.6  | 0.2 | <b>0.001</b>     |
| Waist circumference (cm) | 66.2 | 0.9 | 61.2 | 0.9 | <b>&lt;0.001</b> |
| Overweight/obesity (%)   | 23.0 |     | 10.0 |     | <b>0.001</b>     |

Data were analyzed by ANCOVA adjusted by schools, age and academic year. \*adjusted by schools and academic year. Significant differences are represented in boldfaces.

**Supplementary table 2.** Relationship of BMI z-score with intraindividual variation of dinner timing and the midpoint of food intake.

| BMI z-score                                 |         |       |                |
|---------------------------------------------|---------|-------|----------------|
|                                             | Beta    | SEM   | <i>P-value</i> |
| Dinner phase deviation                      | 0.000   | 0.008 | 0.955          |
| Midpoint of food intake phase deviation     | - 0.009 | 0.005 | 0.089          |
| Interday phase change in dinner timing      | - 0.003 | 0.007 | 0.724          |
| Interday phase change in midpoint of intake | 0.006   | 0.006 | 0.323          |

**Supplementary table 3.** Differences in social jet lag of dinner timing and midpoint of food intake between boys and girls and across school grades.

|                             | <b>Social jet lag<br/>dinner timing<br/>(min)</b> | <b>Social jet lag<br/>midpoint of<br/>food intake<br/>(min)</b> | <b>P-value<br/>Social jet<br/>lag dinner<br/>timing</b> | <b>P-value<br/>Social jet lag<br/>midpoint of<br/>food intake</b> |
|-----------------------------|---------------------------------------------------|-----------------------------------------------------------------|---------------------------------------------------------|-------------------------------------------------------------------|
| <b>Boys</b>                 | -0.4 (31.1)                                       | 39.0 (33.4)                                                     | 0.500                                                   | 0.521                                                             |
| <b>Girls</b>                | 1.5 (34.5)                                        | 41.2 (36.0)                                                     |                                                         |                                                                   |
| <b>Grade 1</b> (Age 8-9y)   | 6.4 <sup>a</sup> (32.2)                           | 45.0 <sup>a</sup> (34.5)                                        | <b>&lt;0.001</b>                                        | <b>&lt;0.001</b>                                                  |
| <b>Grade 2</b> (Age 10-11y) | -14.2 <sup>b</sup> (27.4)                         | 23.2 <sup>b</sup> (29.2)                                        |                                                         |                                                                   |
| <b>Grade 3</b> (Age 11-12y) | 6.0 <sup>a</sup> (34.1)                           | 48.4 <sup>a</sup> (34.5)                                        |                                                         |                                                                   |

Mean (SD). Differences among grades (ages) assessed by ANOVA. Significant differences are represented in boldfaces. Different superindices indicate significant differences among grades.
